# Supplementary material
Source: publisher figshare collection journal article supplement (https://sage.figshare.com/ndownloader/files/13678415)
Supplement: Supplementary file 1 [file 13678415]

## Sheet: Sheet1
Sample No/Taxa	1	2	3	4	5	6	7	8	9	10	11	12	13	14	15	16	17	18	19
Pinus	19	17	19	19	19	69	54	55	53	23	21	17	21	11	1	1	1	1	1
Cedrus	6	10	8	12	10	46	38	38	41	16	10	12	12	4	0	0	0	0	0
Abies	3	6	6	7	4	13	18	15	14	9	6	8	5	4	0	0	0	0	0
Picea	2	4	4	6	3	3	8	3	6	3	3	2	3	2	0	0	0	0	0
Juniperus	2	2	2	2	2	0	0	0	0	0	1	1	0	0	0	0	0	0	0
Larix	1	3	3	3	3	2	3	2	3	3	2	1	3	1	0	0	0	0	0
Quercus	12	12	12	12	9	6	3	2	2	4	6	4	4	3	0	0	0	0	0
Alnus	35	29	29	33	31	15	27	17	19	26	26	28	29	28	0	0	0	0	0
Betula	38	37	36	39	29	19	14	13	11	29	32	31	27	29	0	0	0	0	0
Carpinus	16	21	18	18	19	18	6	8	7	20	18	8	12	7	0	0	0	0	0
Corylus	5	10	11	6	15	7	3	7	3	11	8	4	7	4	0	0	0	0	0
Juglans	3	4	6	3	4	1	2	0	3	1	2	2	2	0	0	0	0	0	0
Ulmus	18	16	15	21	22	13	14	7	12	9	14	14	19	10	0	0	0	0	0
Salix	2	0	0	2	0	1	2	1	2	1	1	2	3	2	0	0	0	0	0
Fraxinus	0	0	0	0	1	1	0	0	0	0	0	0	0	0	0	0	0	0	0
Celtis	0	1	0	0	1	0	1	0	0	0	0	0	0	0	0	0	0	0	0
Mallotus	7	6	13	11	8	0	2	4	6	11	7	0	7	5	0	0	0	0	0
Syzygium	1	3	2	2	3	0	0	0	1	2	0	1	2	2	0	0	0	0	0
Bombax	1	1	3	3	2	1	1	1	1	2	1	0	1	1	0	0	0	0	0

## Sheet: Sheet2
Sample No/Taxa	1	2	3	4	5	6	7	8	9	10	11	12	13	14	15	16	17	18	19
Ephedra	2	0	3	0	1	2	0	0	0	0	1	0	1	1	0	0	0	0	0
Dodonea	9	6	10	12	18	8	0	14	6	8	11	8	7	7	0	0	0	0	0
Poaceae	61	48	69	58	62	69	83	73	69	49	48	52	57	49	6	1	1	0	1
Cerealia	6	8	14	12	11	2	6	4	13	6	14	4	9	7	0	0	0	0	0
Cheno/Am	14	19	11	24	23	17	13	16	16	12	18	9	7	9	0	0	0	0	0
Caryophyllaceae	7	9	8	9	11	13	9	7	8	8	8	8	6	6	0	0	0	0	0
Alternanthera	2	3	0	0	2	2	1	0	0	0	0	0	0	0	0	0	0	0	0
Artemisia	5	5	3	5	0	0	3	4	3	6	7	4	3	1	0	0	0	0	0
Cannabis sotiva	2	1	1	2	0	0	0	0	0	0	3	1	0	0	0	0	0	0	0
Tubuliflora	29	11	12	13	19	9	5	13	16	13	12	13	14	8	0	0	0	0	0
Liguliflorae	2	2	4	0	2	1	0	3	0	1	0	0	0	0	0	0	0	0	0
Malvaceae	16	3	7	3	3	0	3	3	5	5	3	3	4	3	1	0	0	0	0
Xanthium	1	1	2	1	1	2	1	1	2	1	1	1	0	0	0	0	0	0	0
Oldenlandia	6	6	9	7	12	11	0	8	8	10	6	11	6	3	0	0	0	0	0
Aconitum	13	11	16	14	14	14	0	9	12	14	13	13	10	11	0	0	0	0	0
Potentilla/Rosaceae	0	0	1	2	0	0	0	0	0	0	1	2	2	0	0	0	0	0	0
Cyperaceae	2	1	3	2	1	3	1	3	1	3	3	3	1	2	0	0	0	0	0
Polygonum plebieum	1	2	2	1	2	1	1	1	0	0	1	2	0	1	0	0	0	0	0
Pimpinella	1	0	1	0	1	1	0	1	0	1	0	1	1	1	0	0	0	0	0
Polygala	0	0	1	0	0	0	0	0	0	0	0	1	0	0	0	0	0	0	0
Typha	3	3	3	3	3	2	2	2	2	3	3	2	3	3	0	0	0	0	0
Lemna	4	9	4	6	9	3	2	1	2	4	4	7	4	6	0	0	0	0	0
Potamogeton	2	2	3	1	1	1	1	1	1	1	1	1	1	1	0	0	0	0	0
Nymphoides	0	1	0	2	1	0	0	0	0	0	0	0	0	0	0	0	0	0	0
Pseudoschizaea	2	2	3	2	1	0	0	0	0	1	0	1	1	1	0	0	0	0	0
Spirogyra	3	2	3	1	0	0	0	0	0	0	0	0	0	0	0	0	0	0	0
Zygnema	5	4	4	2	5	0	0	0	0	0	0	0	0	0	0	0	0	0	0
Monolete	4	4	2	3	4	2	2	2	1	3	2	3	3	4	0	0	0	0	0
Trilete Type I	11	11	12	10	8	4	8	7	6	9	8	9	10	17	0	0	0	0	0
Glomus	9	11	23	16	6	6	7	2	3	4	6	6	13	10	3	0	0	0	0
Curvularia	3	8	11	15	5	3	1	1	3	2	3	2	1	2	0	0	0	0	0
Nigrospora	13	57	27	39	28	2	13	1	1	1	3	3	3	1	0	0	0	0	0
Tetraploa	2	3	4	4	1	0	0	0	0	0	1	0	0	1	0	0	0	0	0
Cookeina	3	0	0	0	1	0	1	0	0	0	0	0	0	0	0	0	0	0	0
Diplodia	2	4	0	0	0	2	2	1	0	1	0	0	2	0	0	0	0	0	0
Alternaria	1	1	1	2	1	1	2	1	5	1	1	1	1	1	1	0	0	0	0
Helminthosporium	1	3	1	3	0	2	0	2	1	1	3	2	0	2	0	1	0	1	0
Bicelled fungal spore	0	0	1	0	0	1	0	0	1	1	1	1	0	0	0	0	0	0	0
Fungal spore	0	0	0	0	0	0	0	0	0	0	0	0	1	0	0	0	0	0	0
